# Supplementary material
Source: PubMed Central journal article supplement (PMC9022714)
Supplement: jpcrr-9.2.89s1.pdf [file jpcrr-9.2.89s1.pdf]

**Table S1.** Standardized Differences for Assessing Balance of Initial and Matched Samples

| Variable           | Initial sample, unmatched | 1:4 matching |
|--------------------|---------------------------|--------------|
| Age                | 0.4490                    | 0.0061       |
| Gender             | -0.0354                   | 0.0004       |
| Race               | 0.1478                    | -0.0011      |
| Body mass index    | -0.0245                   | 0.0002       |
| History of smoking | 0.0086                    | 0            |
| Hypertension       | -0.0136                   | 0            |
| Diabetes mellitus  | -0.0605                   | 0            |

**Table S2.** Spearman's Correlations Among Greenspace and Socioeconomic Factors

|                              | 1       | 2      | 3      | 4 |
|------------------------------|---------|--------|--------|---|
| 1. NDVI                      | –       |        |        |   |
| 2. Proximity to public parks | -0.021  | –      |        |   |
| 3. ADI state decile          | -0.550* | 0.092* | –      |   |
| 4. ADI national percentile   | -0.548* | 0.085* | 0.992* | – |

\* $P < 0.05$ .  
*ADI, area deprivation index; NDVI, normalized difference vegetation index.*

**Table S3.** Interaction Between NDVI and National ADI

| Index             | Regression coefficient | SE    | z-score (P)   | 95% CI        |
|-------------------|------------------------|-------|---------------|---------------|
| NDVI <sup>a</sup> | -0.897                 | 0.664 | -1.35 (0.177) | -2.2, 0.405   |
| National ADI      | 0.001                  | 0.002 | 0.27 (0.790)  | -0.004, 0.004 |
| NDVI <sup>b</sup> | -0.993                 | 0.557 | -1.78 (0.075) | -2.09, 0.0996 |
| National ADI      | 0.002                  | 0.002 | 1.19 (0.232)  | -0.001, 0.006 |
| NDVI#ADI          | 1.016                  | 0.025 | 0.65 (0.516)  | 0.969, 1.065  |

<sup>a</sup>NDVI coefficient in the multivariate model.  
<sup>b</sup>NDVI coefficient in the univariate model.  
*ADI, area deprivation index; NDVI, normalized difference vegetation index; NDVI#ADI, interaction between NDVI and ADI; SE, standard error.*

**Table S4.** Interaction Between NDVI and State ADI

| Index             | Regression coefficient | SE    | z-score (P)   | 95% CI        |
|-------------------|------------------------|-------|---------------|---------------|
| NDVI <sup>a</sup> | -0.874                 | 0.669 | -1.31 (0.191) | -2.184, 0.436 |
| State ADI         | 0.005                  | 0.017 | 0.37 (0.747)  | -0.010, 0.045 |
| NDVI <sup>b</sup> | -0.993                 | 0.557 | -1.78 (0.075) | -2.09, 0.0996 |
| State ADI         | 0.017                  | 0.014 | 1.25 (0.210)  | -0.010, 0.045 |
| NDVI#ADI          | 1.09                   | 0.206 | 0.46 (0.649)  | 0.753, 1.577  |

<sup>a</sup>NDVI coefficient in the multivariate model.  
<sup>b</sup>NDVI coefficient in the univariate model.  
*ADI, area deprivation index; NDVI, normalized difference vegetation index; NDVI#ADI, interaction between NDVI and ADI; SE, standard error.*
