# Supplementary material
Source: PubMed Central journal article supplement (PMC9022714)
Supplement: jpcrr-9.2.89s2.pdf [file jpcrr-9.2.89s2.pdf]

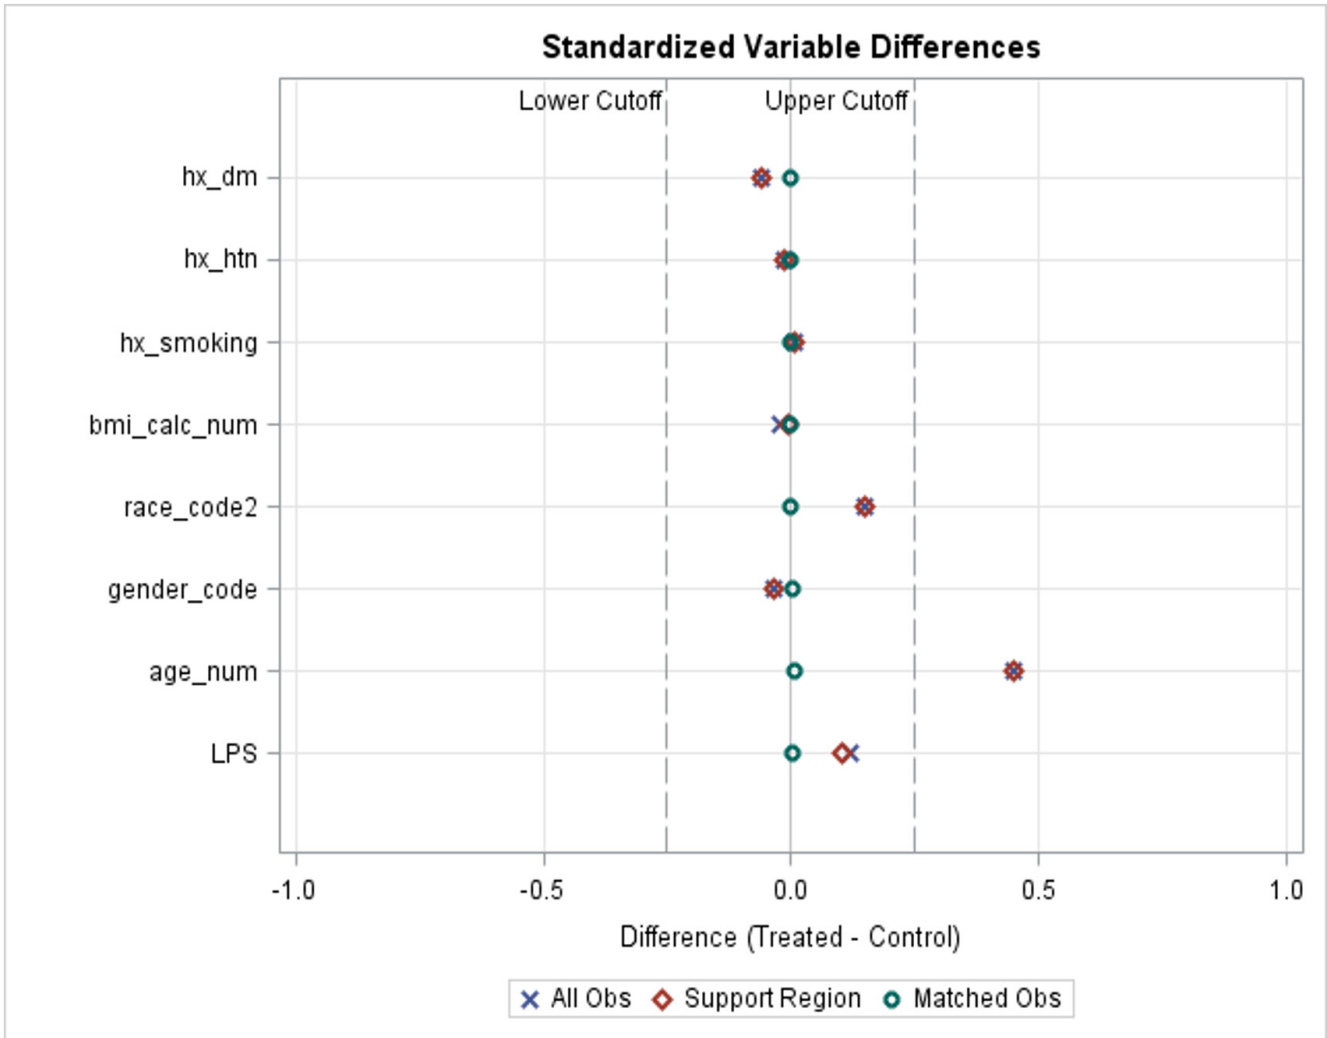

**Figure S1.** Standardized mean differences plot. Standardized mean differences are significantly reduced in matched observations. The plot shows all differences for the matched observations are within the recommended limits of -0.25 and 0.25, as indicated by the dashed vertical lines. The matching resulted in good variable balance for our study cohort. bmi\_calc\_num, body mass index calculated from subject's height and weight, dm, diabetes, htn, hypertension, hx, history of, LPS, logit of propensity score.
